# Supplementary material for: The rs78378222 prevalence and the copy loss of the protective allele A in the tumor tissue of diffuse large B-cell lymphoma
Source: PeerJ. 2020 Nov 12;8:e10335. doi: 10.7717/peerj.10335 (PMC7666812; doi:10.7717/peerj.10335)
Supplement: Supplemental Information 2 — Nucleotides variants in rs78378222 for the patients under study resent raw data for the analysis. [file peerj-08-10335-s002.xls]

## Sheet: data_patients
Sample	3UTR TP53
Cases Tumor	A/A
Cases Tumor	A/C
Cases Tumor	A/A
Cases Tumor	A/A
Cases Tumor	A/A
Cases Tumor	A/A
Cases Tumor	A/A
Cases Tumor	A/A
Cases Tumor	A/A
Cases Tumor	A/A
Cases Tumor	A/A
Cases Tumor	A/A
Cases Tumor	A/A
Cases Tumor	A/A
Cases Tumor	A/A
Cases Tumor	A/A
Cases Tumor	A/A
Cases Tumor	A/A
Cases Tumor	A/A
Cases Tumor	A/A
Cases Tumor	A/A
Cases Tumor	A/A
Cases Tumor	A/A
Cases Tumor	A/A
Cases Tumor	A/A
Cases Tumor	A/A
Cases Tumor	A/A
Cases Tumor	A/A
Cases Tumor	A/C LOH
Cases Tumor	A/A
Cases Tumor	A/C
Cases Tumor	A/A
Cases Tumor	A/A
Cases Tumor	A/A
Cases Tumor	A/C LOH
Cases Tumor	A/A
Cases Tumor	A/A
Cases Tumor	A/A
Cases Tumor	A/A
Cases Tumor	A/C LOH
Cases Tumor	A/A
Cases Tumor	A/A
Cases Tumor	A/C
Cases Tumor	A/A
Cases Tumor	A/A
Cases Tumor	A/A
Cases Tumor	A/A
Cases Tumor	A/C LOH
Cases Tumor	A/A
Cases Tumor	A/A
Cases Tumor	A/A
Cases Tumor	A/A
Cases Tumor	A/A
Cases Tumor	A/C
Cases Tumor	A/A
Cases Tumor	A/A
Cases Tumor	A/A
Cases Tumor	A/C
Cases Tumor	A/A
Cases Tumor	A/A
Cases Tumor	A/C LOH
Cases Tumor	A/A
Cases Tumor	A/A
Cases Tumor	A/A
Cases Tumor	A/C
Cases Tumor	A/A
Cases Tumor	A/A
Cases Tumor	A/A
Cases Tumor	A/A
Cases Tumor	A/A
Cases Tumor	A/A
Cases Tumor	A/A
Cases Tumor	A/A
Cases Tumor	A/A
Cases Tumor	A/A
Cases Tumor	A/A
Cases Tumor	A/A
Cases Tumor	A/A
Cases Tumor	A/A
Cases Tumor	A/A
Cases Tumor	A/A
Cases Tumor	A/A
Cases Tumor	A/A
Cases Tumor	A/A
Cases Tumor	A/A
Cases Tumor	A/A
Cases Tumor	A/A
Cases Tumor	A/A
Cases Tumor	A/A
Cases Tumor	A/A
Cases Tumor	A/A
Cases Tumor	A/A
Cases Tumor	A/A
Cases Tumor	A/A
Cases Tumor	A/A
Cases Tumor	A/A
Cases Tumor	A/A
Cases Tumor	A/A
Cases Tumor	A/A
Cases Tumor	A/A
Cases Tumor	A/A
Cases Tumor	A/A
Cases Tumor	A/A
Cases Tumor	A/A
Cases Tumor	A/A
Cases Tumor	A/A
Cases Tumor	A/A
Cases Tumor	A/A
Cases Tumor	A/A
Cases Tumor	A/A
Cases Tumor	A/A
Cases Tumor	A/A
Cases Tumor	A/A
Cases Tumor	A/A
Cases Tumor	A/A
Cases Tumor	A/A
Cases Tumor	A/A
Cases Tumor	A/A
Cases Tumor	A/A
Cases Tumor	A/A
Cases Tumor	A/A
Cases Tumor	A/A
Cases Tumor	A/A
Cases Tumor	A/A
Cases Tumor	A/A
Cases Tumor	A/A
Cases Tumor	A/A
Cases Tumor	A/A
Cases Tumor	A/A
Cases Tumor	A/A
Cases Tumor	A/A
Cases Tumor	A/A
Cases Tumor	A/A
Cases Tumor	A/A
Cases Tumor	A/A
Cases Tumor	A/A
Cases Blood	A/A
Cases Blood	A/A
Cases Blood	A/A
Cases Blood	A/A
Cases Blood	A/A
Cases Blood	A/A
Cases Blood	A/A
Cases Blood	A/A
Cases Blood	A/A
Cases Blood	A/A
Cases Blood	A/C
Cases Blood	A/A
Cases Blood	A/A
Cases Blood	A/A
Cases Blood	A/A
Cases Blood	A/A
Cases Blood	A/A
Cases Blood	A/C
Cases Blood	A/A
Cases Blood	A/A
Cases Blood	A/C
Cases Blood	A/A
Cases Blood	A/A
Cases Blood	A/A
Cases Blood	A/A
Cases Blood	A/A
Cases Blood	A/A
Cases Blood	A/A
Cases Blood	A/A
Cases Blood	A/C
Cases Blood	A/A
Cases Blood	A/A
Cases Blood	A/A
Cases Blood	A/A
Cases Blood	A/A
Cases Blood	A/A
Cases Blood	A/A
Cases Blood	A/A
Cases Blood	A/A
Cases Blood	A/A
Cases Blood	A/A
Cases Blood	A/A
Cases Blood	A/A
Cases Blood	A/A
Cases Blood	A/A
Cases Blood	A/A
Cases Blood	A/A
Cases Blood	A/A
Cases Blood	A/A
Cases Blood	A/A
Cases Blood	A/A
Cases Blood	A/A
Cases Blood	A/A
Cases Blood	A/A
Cases Blood	A/A
Cases Blood	A/A
Cases Blood	A/A
Cases Blood	A/A
Cases Blood	A/A
Cases Blood	A/A
Cases Blood	A/A
Cases Blood	A/A
Cases Blood	A/A
Cases Blood	A/A
Cases Blood	A/A
Cases Blood	A/A
Cases Blood	A/A
Cases Blood	A/C
Cases Blood	A/A
Cases Blood	A/A
Cases Blood	A/A
Cases Blood	A/A
Cases Blood	A/A
Cases Blood	A/A
Cases Blood	A/A
Cases Blood	A/A
Cases Blood	A/A
Cases Blood	A/A
Cases Blood	A/A
Cases Blood	A/A
Cases Blood	A/A
Cases Blood	A/A
Cases Blood	A/A
Cases Blood	A/A
Cases Blood	A/A
Cases Blood	A/A
Cases Blood	A/A
Cases Blood	A/A
Cases Blood	A/A
Cases Blood	A/A
Cases Blood	A/A
Cases Blood	A/A
Cases Blood	A/A
Cases Blood	A/A
Cases Blood	A/A
Cases Blood	A/A
Cases Blood	A/A
Cases Blood	A/A
Cases Blood	A/A
Cases Blood	A/A
Cases Blood	A/A
Cases Blood	A/A
Cases Blood	A/A
Cases Blood	A/A
Cases Blood	A/A
Cases Blood	A/A
Cases Blood	A/A
Cases Blood	A/A
Cases Blood	A/C
Cases Blood	A/A
Cases Blood	A/A
Cases Blood	A/A
Cases Blood	A/A
Cases Blood	A/A
Cases Blood	A/A
Cases Blood	A/A
Cases Blood	A/A
Cases Blood	A/A
Cases Blood	A/A
Cases Blood	A/A
Cases Blood	A/A
Cases Blood	A/A
Cases Blood	A/A
Cases Blood	A/A
Cases Blood	A/A
Cases Blood	A/A
Cases Blood	A/A
Cases Blood	A/A
Cases Blood	A/A
Cases Blood	A/A
Cases Blood	A/A
Cases Blood	A/A
Cases Blood	A/A
Cases Blood	A/A
Cases Blood	A/A
Cases Blood	A/A
Cases Blood	A/A
Cases Blood	A/A
Cases Blood	A/A
Cases Blood	A/A
Cases Blood	A/A
Cases Blood	A/A
Cases Blood	A/A
Cases Blood	A/A
Cases Blood	A/A
Cases Blood	A/A
Cases Blood	A/A
Cases Blood	A/A
Cases Blood	A/A
Cases Blood	A/A
Controls	A/A
Controls	A/A
Controls	A/A
Controls	A/A
Controls	A/A
Controls	A/A
Controls	A/A
Controls	A/A
Controls	A/A
Controls	A/A
Controls	A/A
Controls	A/A
Controls	A/A
Controls	A/A
Controls	A/A
Controls	A/A
Controls	A/A
Controls	A/A
Controls	A/A
Controls	A/A
Controls	A/A
Controls	A/A
Controls	A/A
Controls	A/A
Controls	A/A
Controls	A/A
Controls	A/A
Controls	A/A
Controls	A/A
Controls	A/A
Controls	A/A
Controls	A/A
Controls	A/A
Controls	A/C
Controls	A/A
Controls	A/A
Controls	A/A
Controls	A/A
Controls	A/A
Controls	A/A
Controls	A/A
Controls	A/A
Controls	A/A
Controls	A/A
Controls	A/A
Controls	A/A
Controls	A/A
Controls	A/A
Controls	A/A
Controls	A/A
Controls	A/A
Controls	A/A
Controls	A/A
Controls	A/A
Controls	A/A
Controls	A/A
Controls	A/A
Controls	A/A
Controls	A/A
Controls	A/A
Controls	A/A
Controls	A/A
Controls	A/A
Controls	A/A
Controls	A/A
Controls	A/A
Controls	A/A
Controls	A/A
Controls	A/A
Controls	A/A
Controls	A/A
Controls	A/A
Controls	A/A
Controls	A/A
Controls	A/A
Controls	A/A
Controls	A/C
Controls	A/A
Controls	A/A
Controls	A/A
Controls	A/A
Controls	A/A
Controls	A/A
Controls	A/A
Controls	A/A
Controls	A/A
Controls	A/A
Controls	A/A
Controls	A/A
Controls	A/A
Controls	A/A
Controls	A/A
Controls	A/A
Controls	A/A
Controls	A/A
Controls	A/A
Controls	A/A
Controls	A/A
Controls	A/A
Controls	A/A
Controls	A/A
Controls	A/A
Controls	A/A
Controls	A/A
Controls	A/A
Controls	A/A
Controls	A/A
Controls	A/A
Controls	A/A
Controls	A/A
Controls	A/A
Controls	A/A
Controls	A/A
Controls	A/A
Controls	A/A
Controls	A/A
Controls	A/A
Controls	A/A
Controls	A/A
Controls	A/A
Controls	A/A
Controls	A/A
Controls	A/A
Controls	A/A
Controls	A/A
Controls	A/A
Controls	A/A
Controls	A/A
Controls	A/A
Controls	A/A
Controls	A/A
Controls	A/C
Controls	A/A
Controls	A/A
Controls	A/A
Controls	A/A
Controls	A/A
Controls	A/A
Controls	A/A
Controls	A/A
Controls	A/A
Controls	A/A
Controls	A/A
Controls	A/A
Controls	A/A
Controls	A/A
Controls	A/A
Controls	A/A
Controls	A/C
Controls	A/A
Controls	A/A
Controls	A/A
Controls	A/A
Controls	A/A
Controls	A/A
Controls	A/A
Controls	A/A
Controls	A/A
Controls	A/A
Controls	A/A
Controls	A/A
Controls	A/A
Controls	A/A
Controls	A/A
Controls	A/A
Controls	A/A
Controls	A/A
Controls	A/A
Controls	A/A
Controls	A/A
